# Supplementary material
Source: Springer Nature journal article supplement (https://www.springermedizin.de/resource/supplementary/13058_2004_961_MOESM5_ESM.pdf/9705738)

**(a)**

Counts

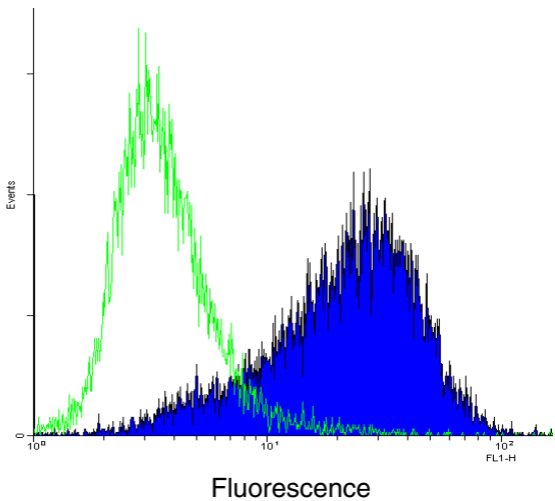**(b)**

Counts

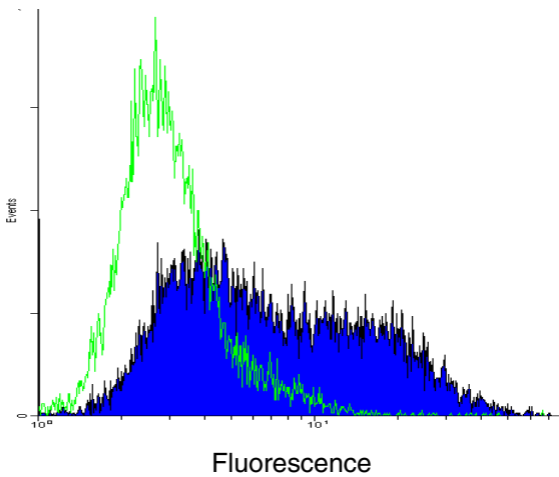

Supplement: MOESM5 [file 9705738]
